# Supplementary material for: Carbon dot-assisted hydrothermal synthesis of flower-like MoS2nanospheres constructed by few-layered multiphase MoS2nanosheets for supercapacitors
Source: Royal Society of Chemistry journal article supplement (doi:10.1039/c6ra15074h), 2016-01-01
Supplement: c6ra15074h1.pdf [file c6ra15074h1.pdf]

## Supporting Information

Carbon dots-assisted hydrothermal synthesis of flower-like MoS<sub>2</sub> nanospheres  
constructed by few-layered multiphase MoS<sub>2</sub> nanosheets for supercapacitor

Jinzhu Wu\*, Jun Dai, Yanbin Shao, Meiqi Cao, Xiaohong Wu\*

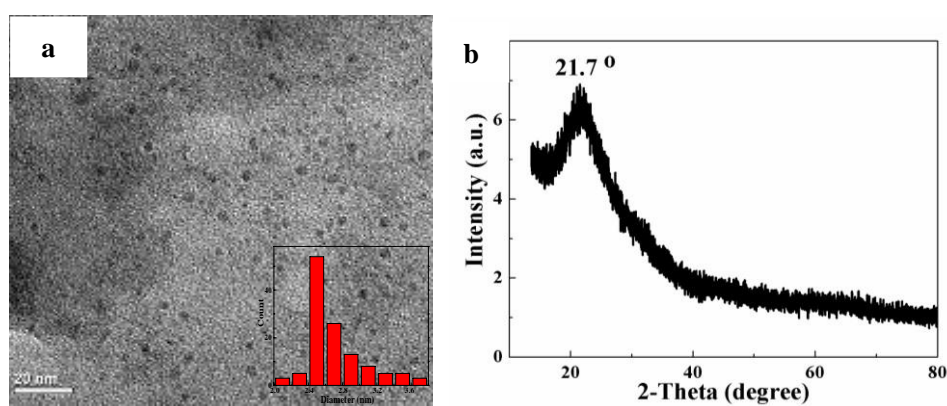

**Figure S1** (a) TEM image and (b) XRD pattern of the as-prepared CDs. Inset in (a) is corresponding size distribution histogram.

The morphology and crystal phase structure of the as-prepared CDs were investigated by TEM and XRD measurements (Figure S1). TEM image shows that CDs are quasi-spherical and well-dispersed (Figure S1(a)). They have a narrow size distribution with the diameters around 2.5 nm (Figure S1(a) inset). XRD pattern of the as-prepared CDs displays a broad and weak diffraction peak centered at 21.7° with the calculated interlayer spacing of 0.41 nm based on Bragg equation (Figure S1(b)), which represents the inter-planar (*d*-spacing) graphitic stacking. This value is same as that of reported nitrogen and sulfur co-doped CDs (N/S-CDs, 0.41 nm)<sup>[1]</sup>, and is larger than that of the (002) plane of bulk graphite (0.34 nm). The increased *d*-spacing can be ascribed to the effects of abundant functional groups at the edges of CDs, which

enlarge the spacing of graphite-like carbon layers.<sup>[2]</sup>

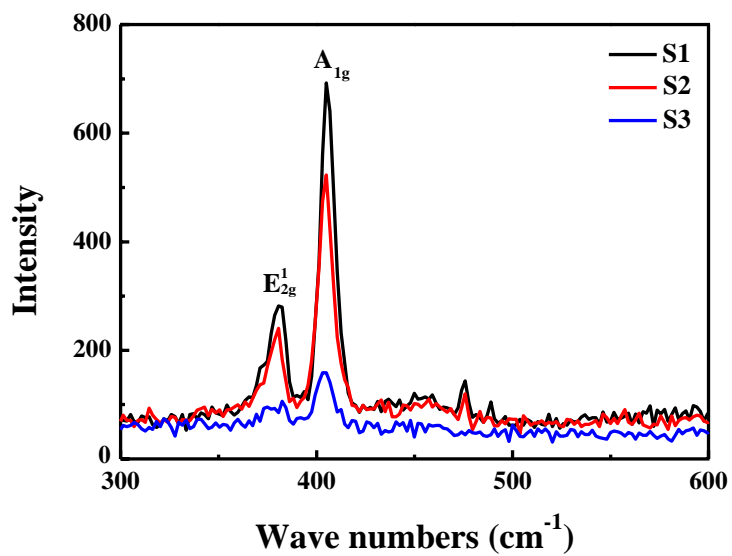

**Figure S2** Raman spectra of various MoS<sub>2</sub> synthesized with the assistance of CDs of 5 mg (S1), 10 mg (S2) and 20 mg (S3).

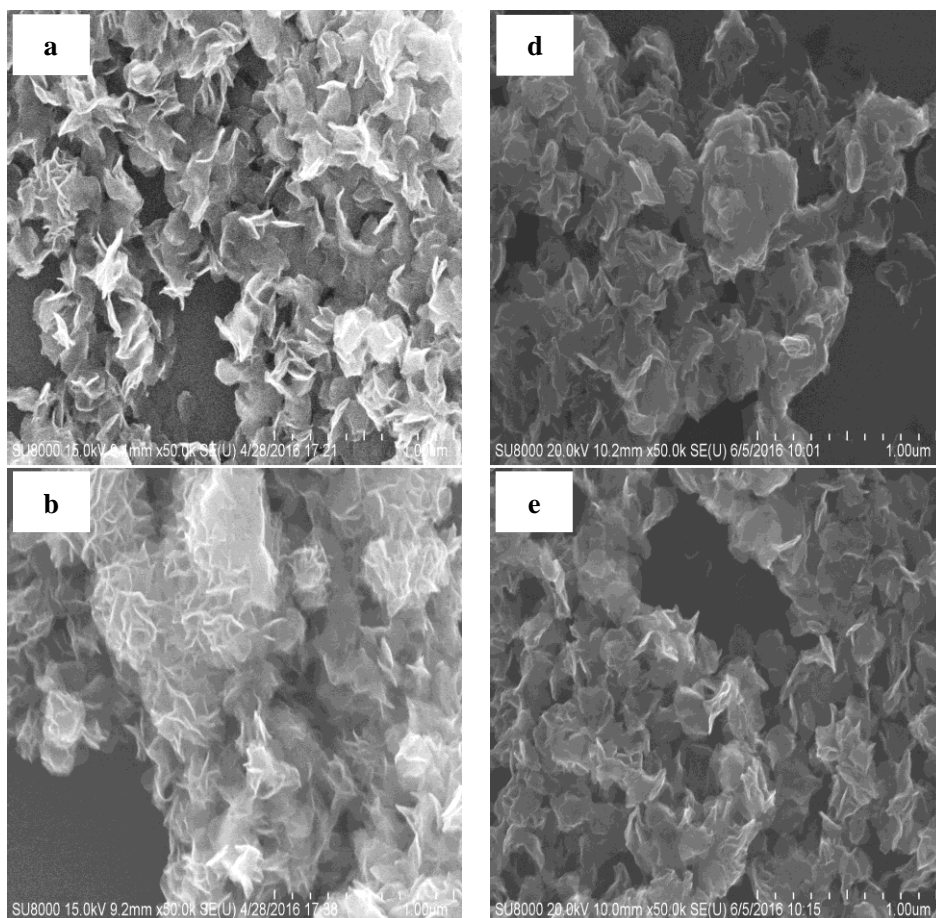

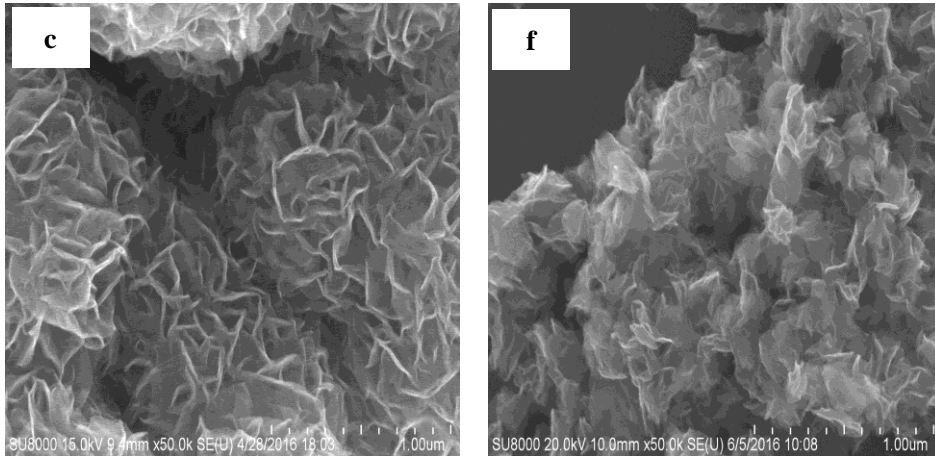

Figure S3 SEM images of MoS<sub>2</sub> obtained in the presence (left panel) or absence (right panel) of CDs in the synthetic time of 1.5 h (a, d), 2.0 h (b, e) and 2.5 h (c, f).

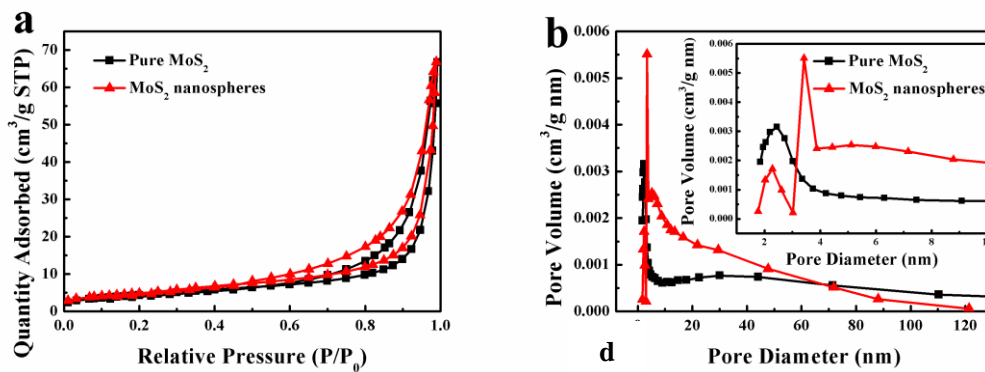

Figure S4 (a) N<sub>2</sub> adsorption and desorption isotherms and (b) pore size distribution of different MoS<sub>2</sub> obtained in the absence or presence of CDs. Inset in (b) is the curve of a selected region (pore diameter less than 10 nm).

## References

- [1] Peng J, Gao W, Gupta BK, Liu Z, Romero-Aburto R, Ge L, et al. Graphene quantum dots derived from carbon fibers. *Nano letters* 2012; 12(2):844-9.
- [2] Hu YP, Yang J, Tian JW, Jia L, Yu YS. Waster frying oil as a precursor for one-step synthesis of sulfur-doped carbon dots with pH-sensitive photoluminescence. *Carbon* 2014; 77:775-82.
